# Supplementary material for: Protected lithium anode with porous Al2O3layer for lithium–sulfur battery
Source: Royal Society of Chemistry journal article supplement (doi:10.1039/c5ta01490e), 2015-01-01
Supplement: c5ta01490e1.pdf [file c5ta01490e1.pdf]

## Protected lithium anode with porous $\text{Al}_2\text{O}_3$ layer for lithium-sulfur battery

Hang-Kun Jing, Ling-Long Kong, Sheng Liu, Guo-Ran Li and Xue-Ping Gao

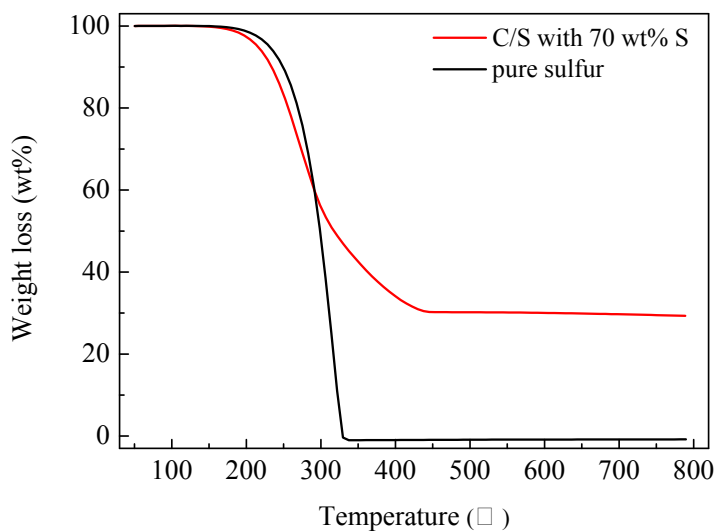

Fig.S1 TG curves of pure sulfur and S/C composites under Ar atmosphere with a heating rate of  $10\text{ °C min}^{-1}$ .

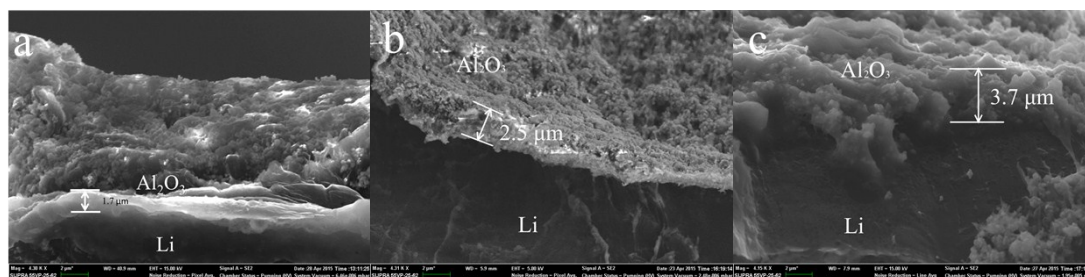

Fig S2 Cross-sectional SEM images of protected Li anode with (a) 0.23, (b) 0.58, and (c) 0.73  $\text{mg cm}^{-2}$  coating amounts of  $\text{Al}_2\text{O}_3$  coating layer on lithium anode surface, respectively.

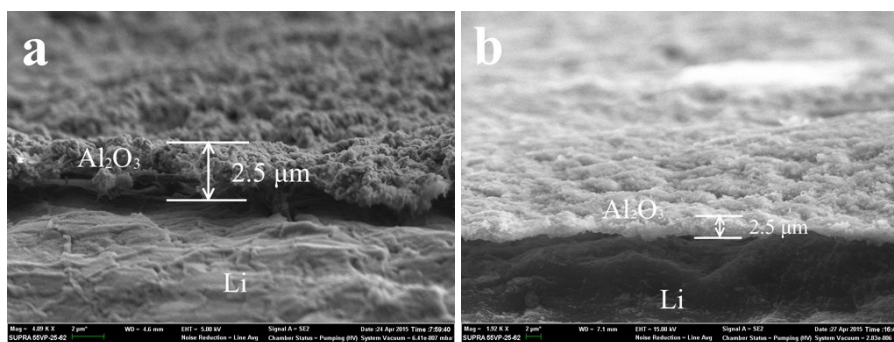

Fig.S3 Cross-sectional SEM images of protected Li anode with  $\text{Al}_2\text{O}_3$  layer ( $0.58\text{ mg cm}^{-2}$ ) after initial three cycling at (a) discharged state and (b) charged state.

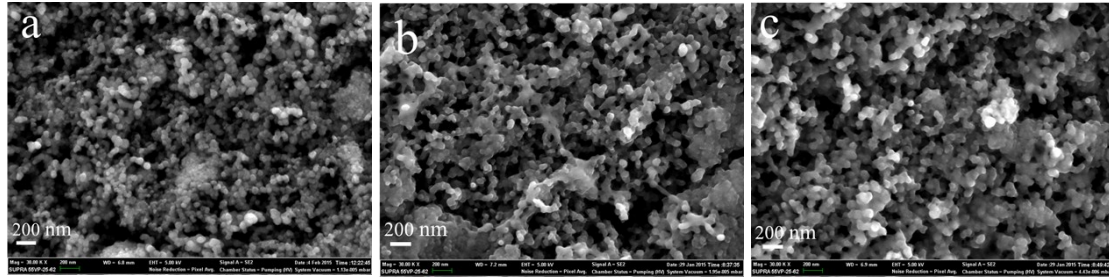

Fig.S4 The surface morphology of sulfur cathode: (a) before cycling (b) with fresh Li anode after 50<sup>th</sup> cycling (c) with protected Li anode after 50<sup>th</sup> cycling.
